# Supplementary material for: Exploring Potential Bioactive Peptides in Fermented Bactrian Camel’s Milk and Mare’s Milk Made by Mongolian Nomads
Source: PubMed Central journal article supplement (PMC7762409; doi:10.3390/foods9121817), 2020-12-07
Supplement: foods-09-01817-s001.pdf [file foods-09-01817-s001.pdf]

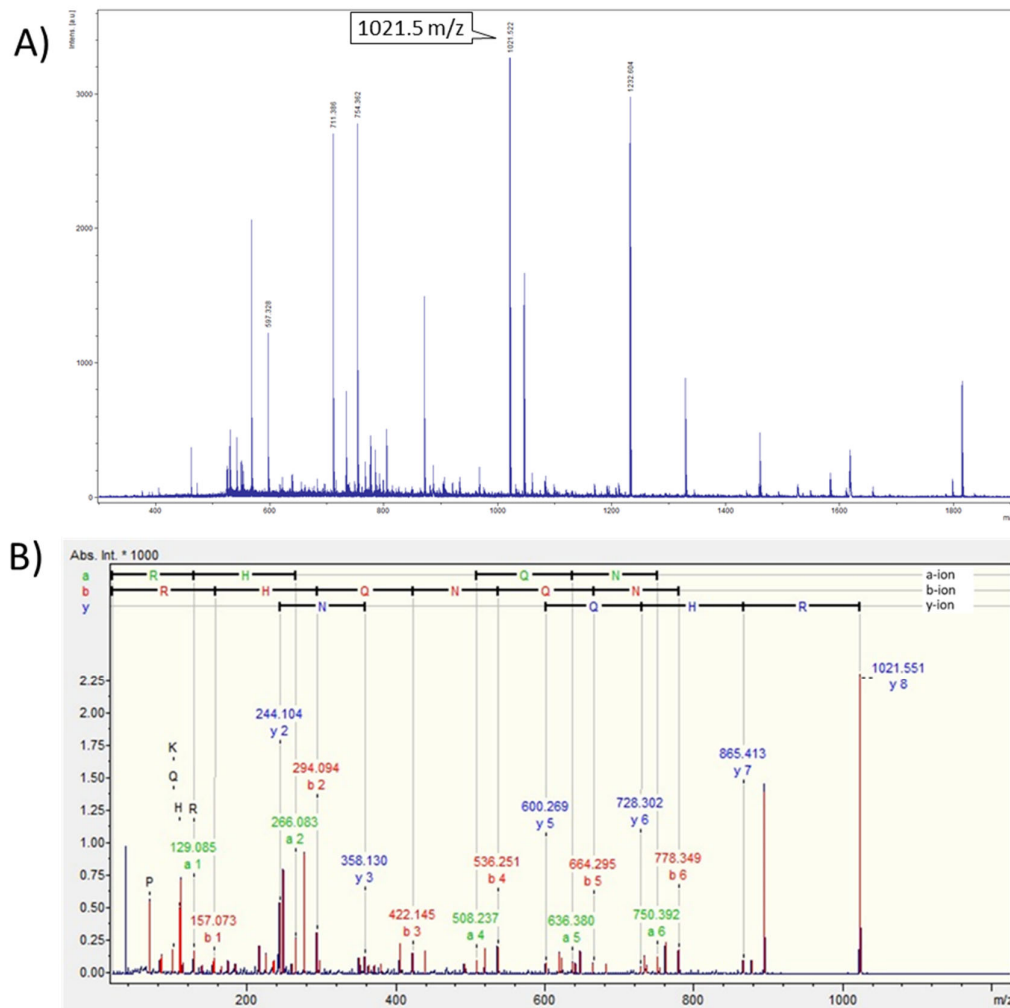

**Figure S1.** MS spectrum of C3-3 (A) and MS/MS identification of a peak of  $m/z$  1021.522 (B).



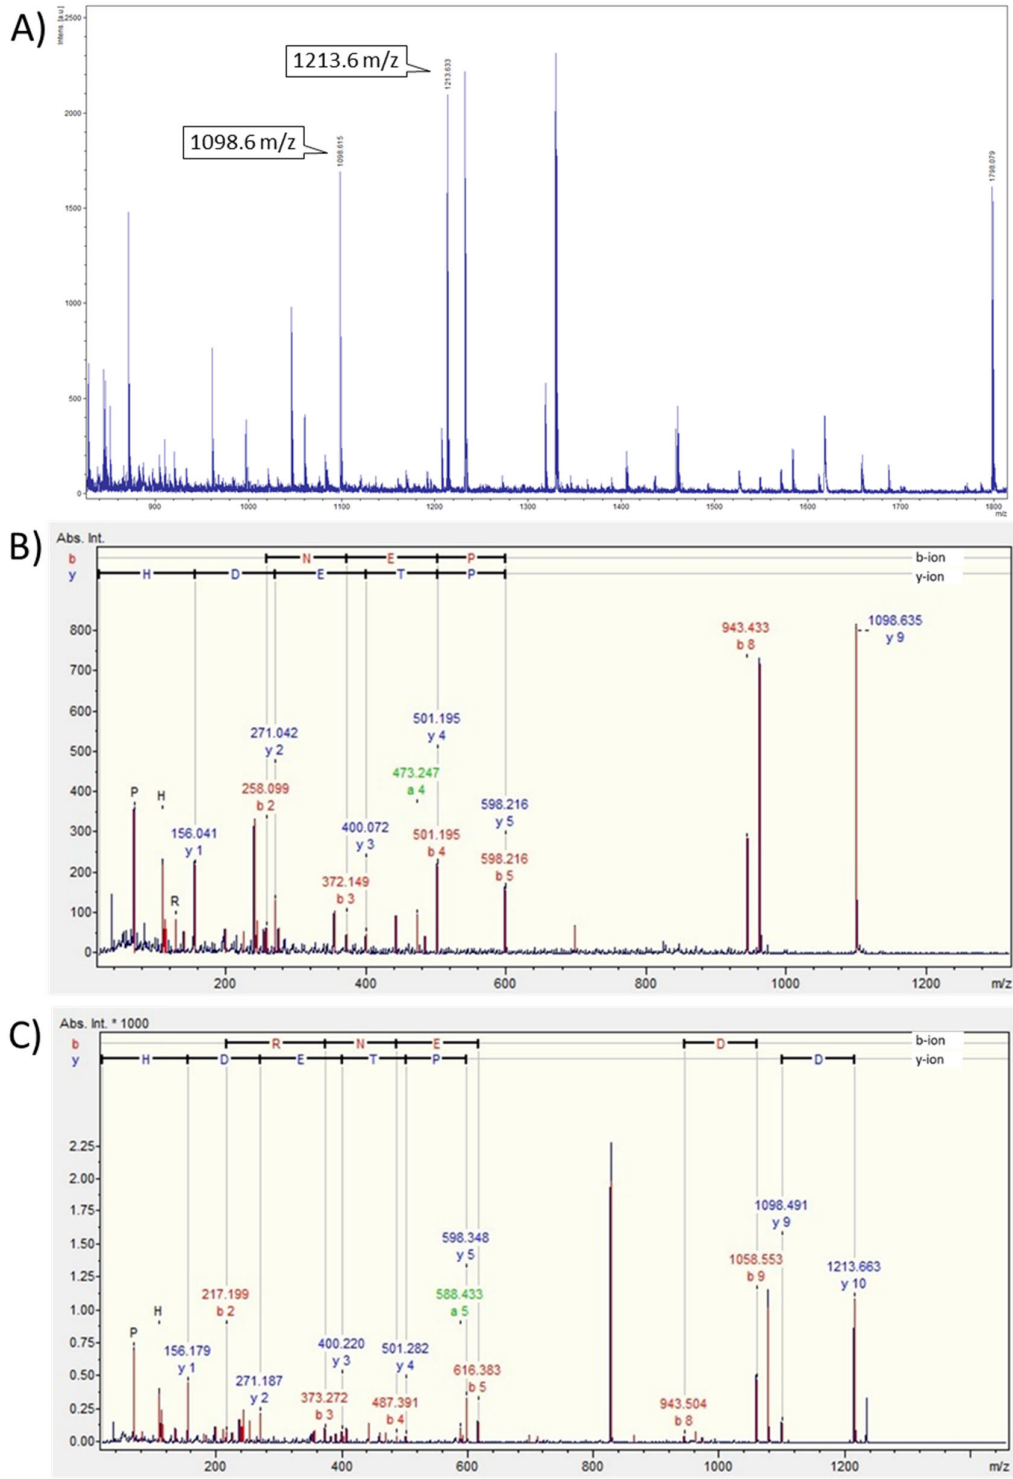

**Figure S3.** MS spectrum of C3-5 (A) and MS/MS identification of two peaks of *m/z* 1098.615 (B) and 1213.633 (C).

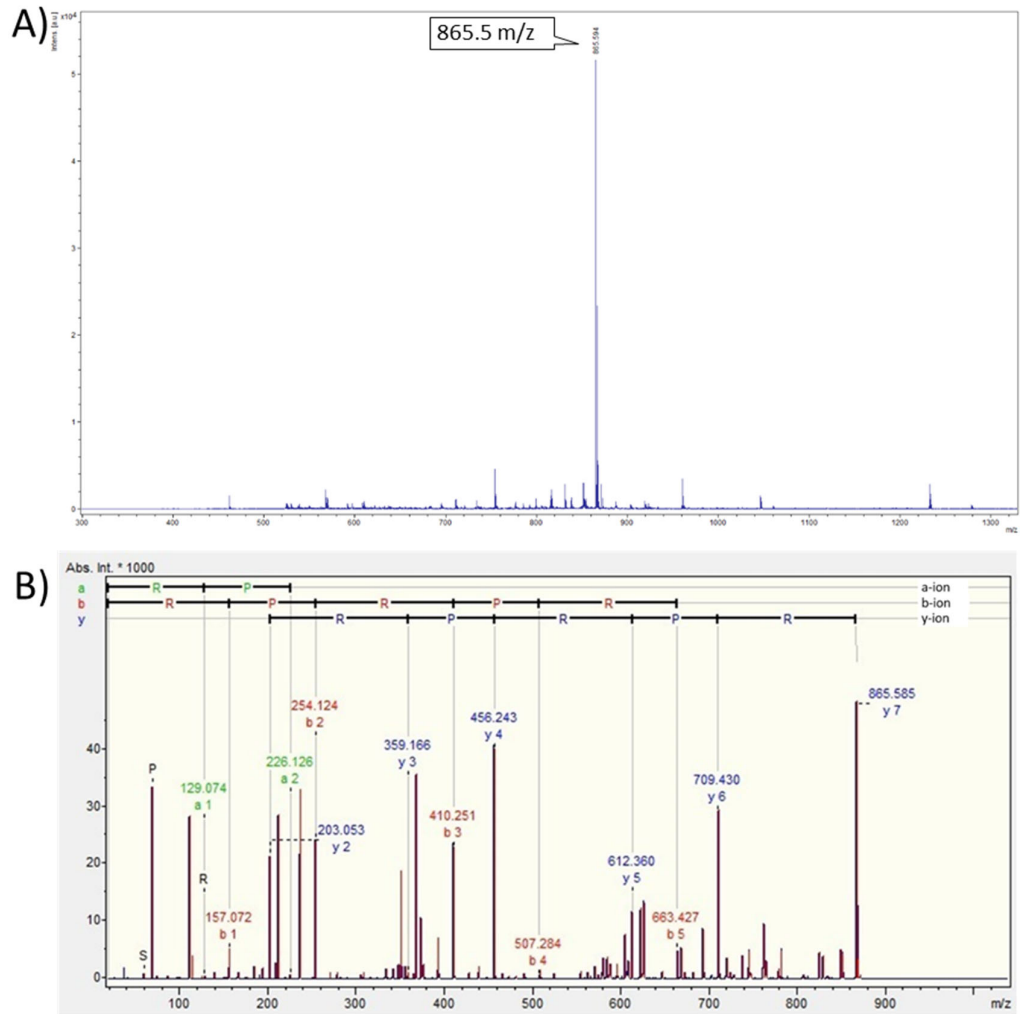

Figure S4. MS spectrum of C3-6 (A) and MS/MS identification of a peak of  $m/z$  865.548 (B).

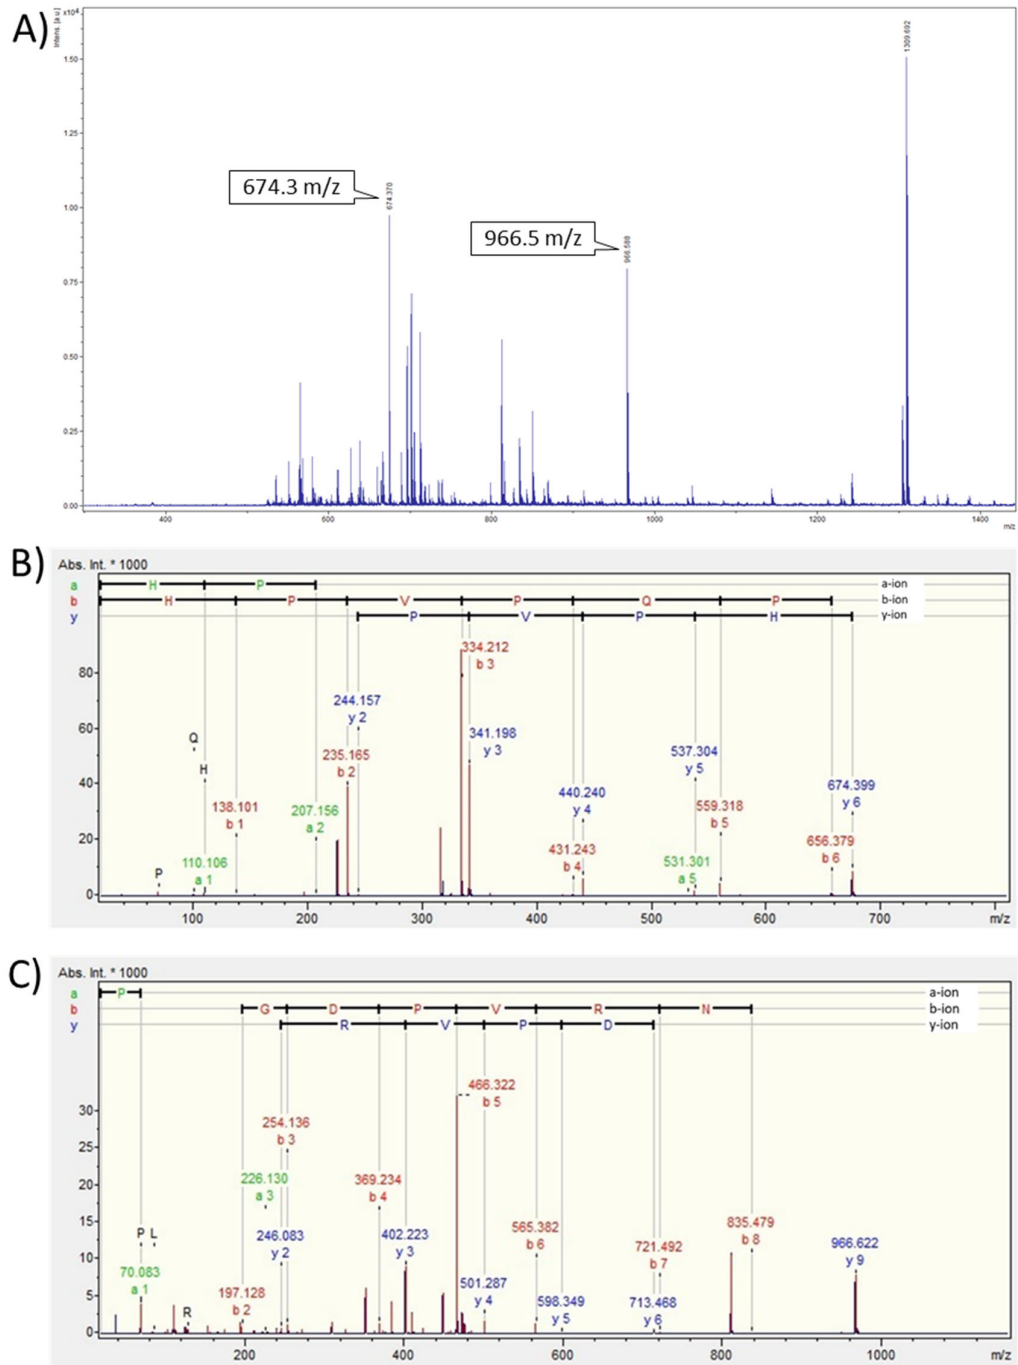

**Figure S5.** MS spectrum of C3-8 (A) and MS/MS identification of two peaks of  $m/z$  674.370 (B) and 966.588 (C).

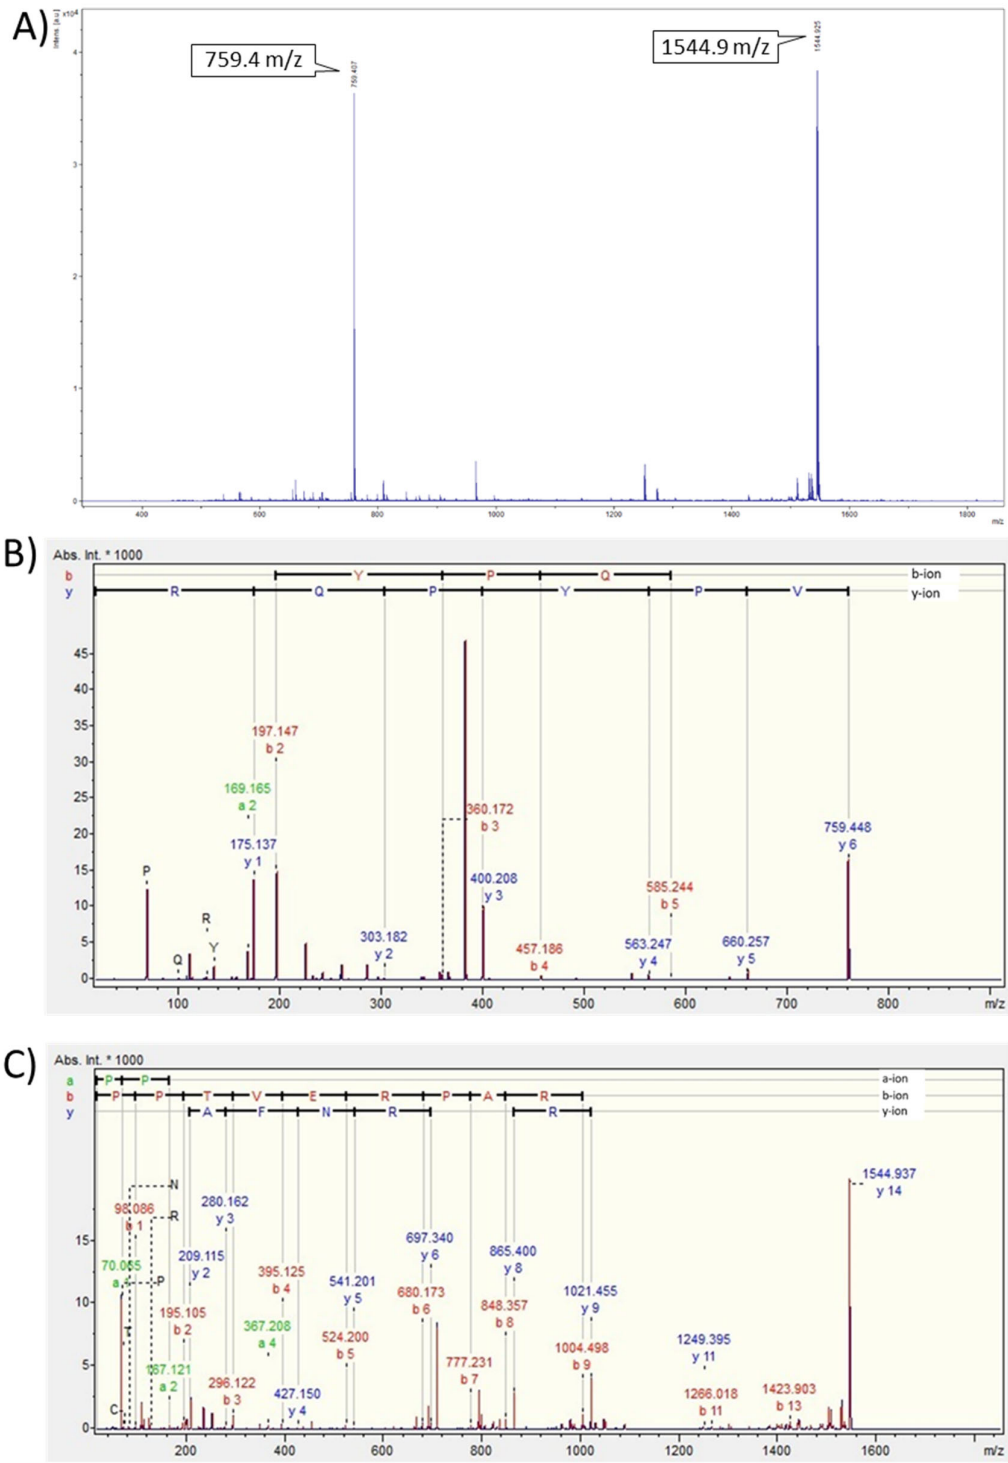

**Figure S6.** MS spectrum of C3-9 (A) and MS/MS identification of two peaks of  $m/z$  759.415 (B) and 1544.925 (C).

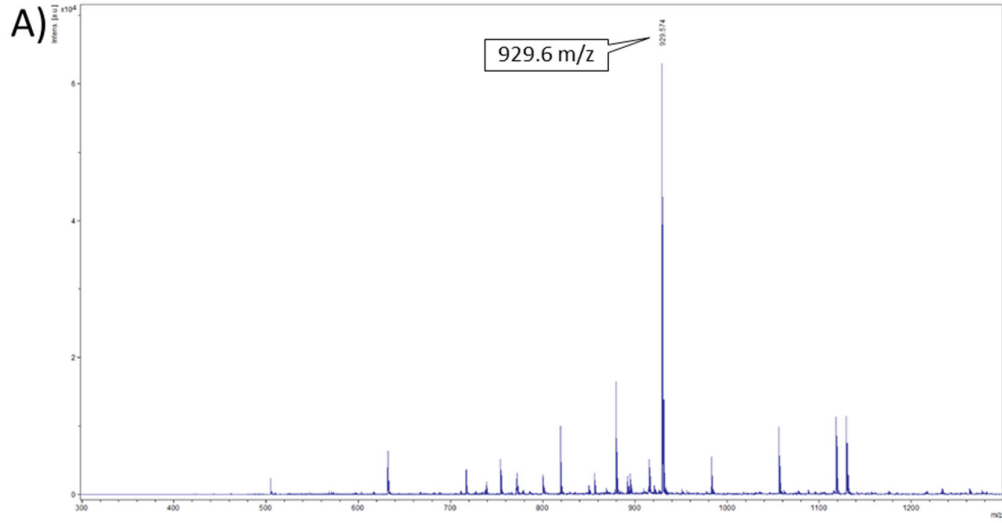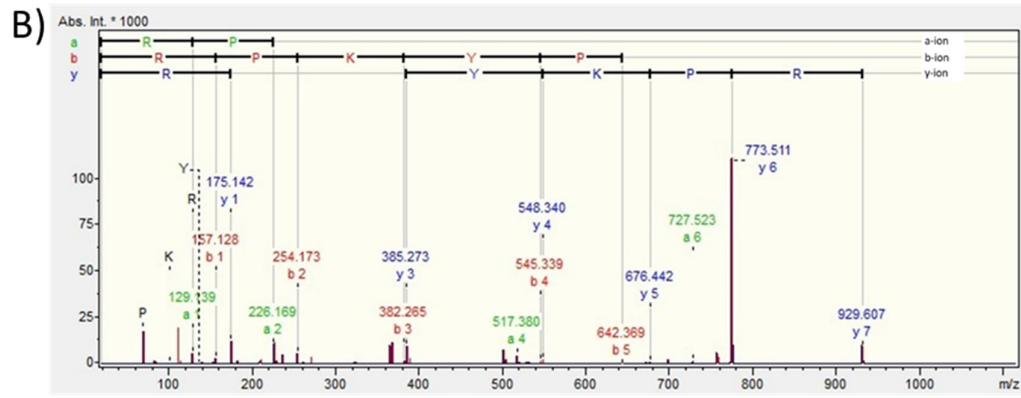

Figure S7. MS spectrum of C3-10 (A) and MS/MS identification of a peak of  $m/z$  929.574 (B).

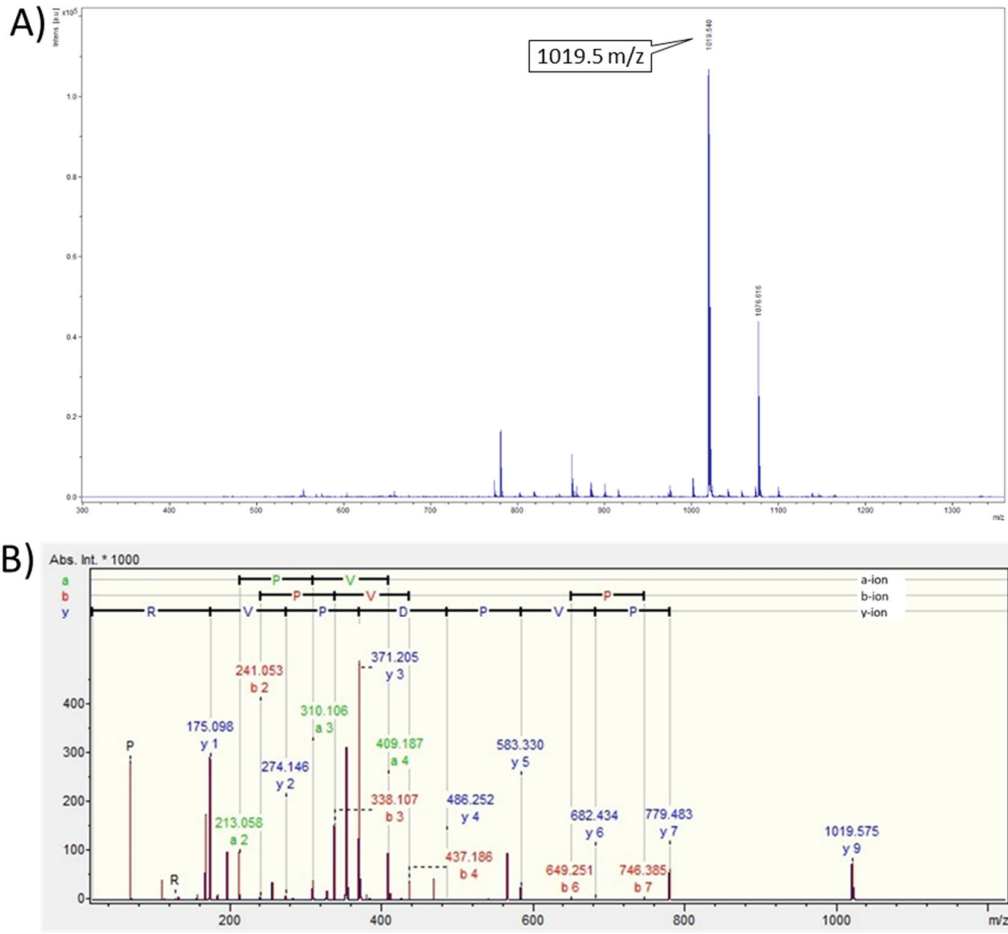

**Figure S8.** MS spectrum of C3-11 (**A**) and MS/MS identification of a peak of  $m/z$  1019.540 (**B**).



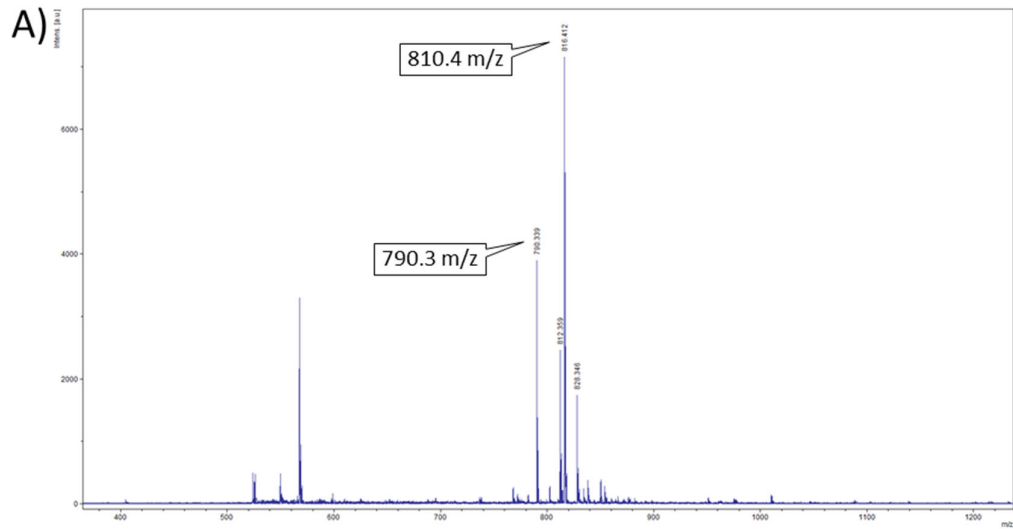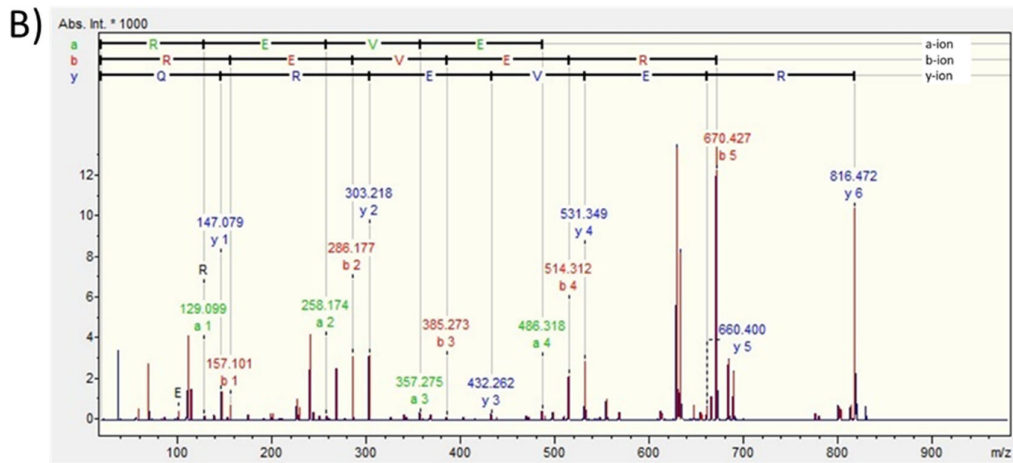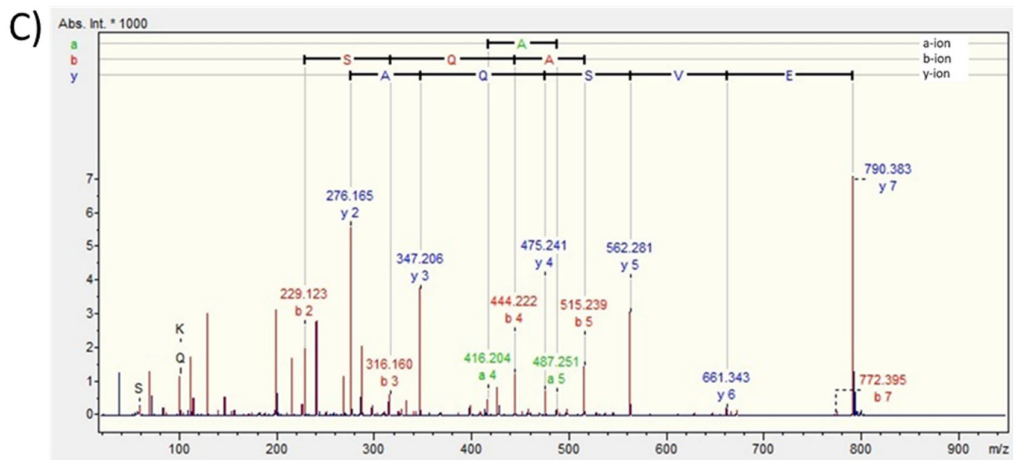

**Figure S9.** MS spectrum of H1-1 (A) and MS/MS identification of two peaks of  $m/z$  816.432 (B) and 790.394 (C).

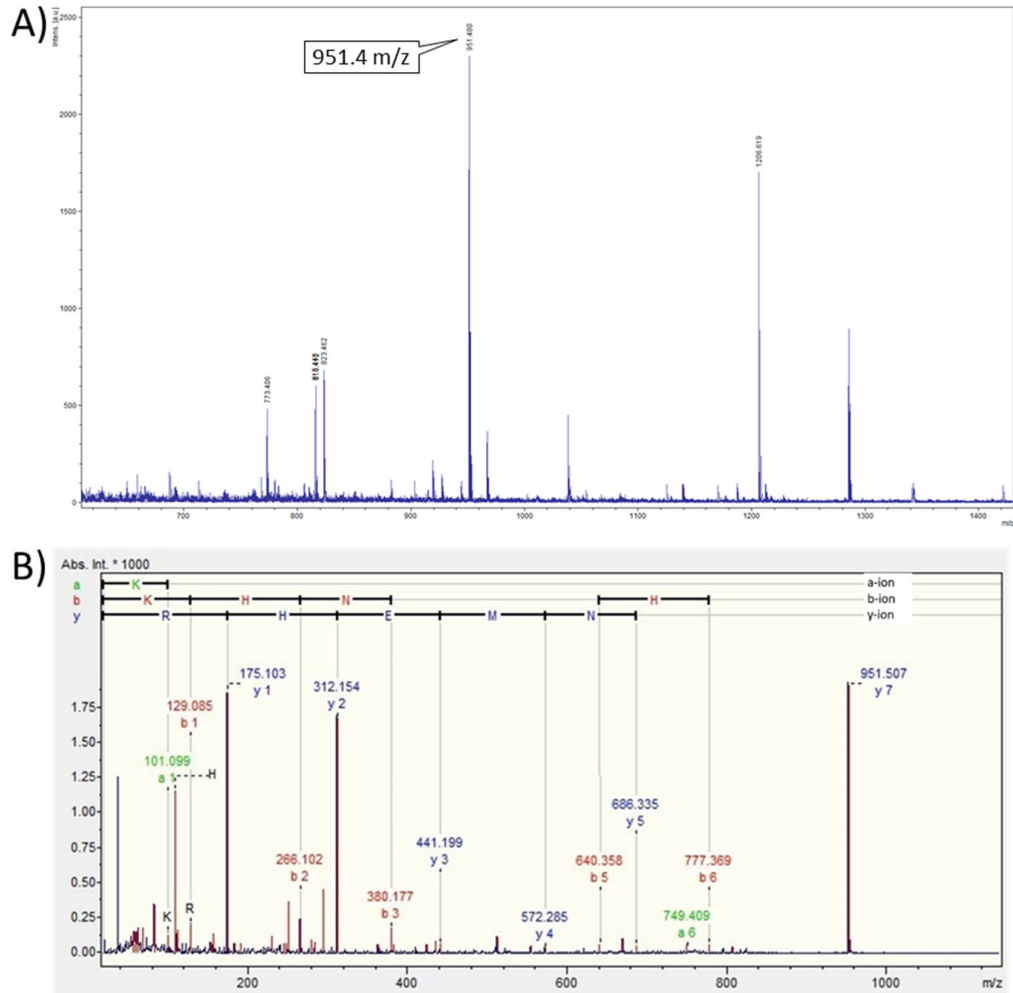

**Figure S10.** MS spectrum of H1-2 (A) and MS/MS identification of a peak of  $m/z$  951.458 (B).

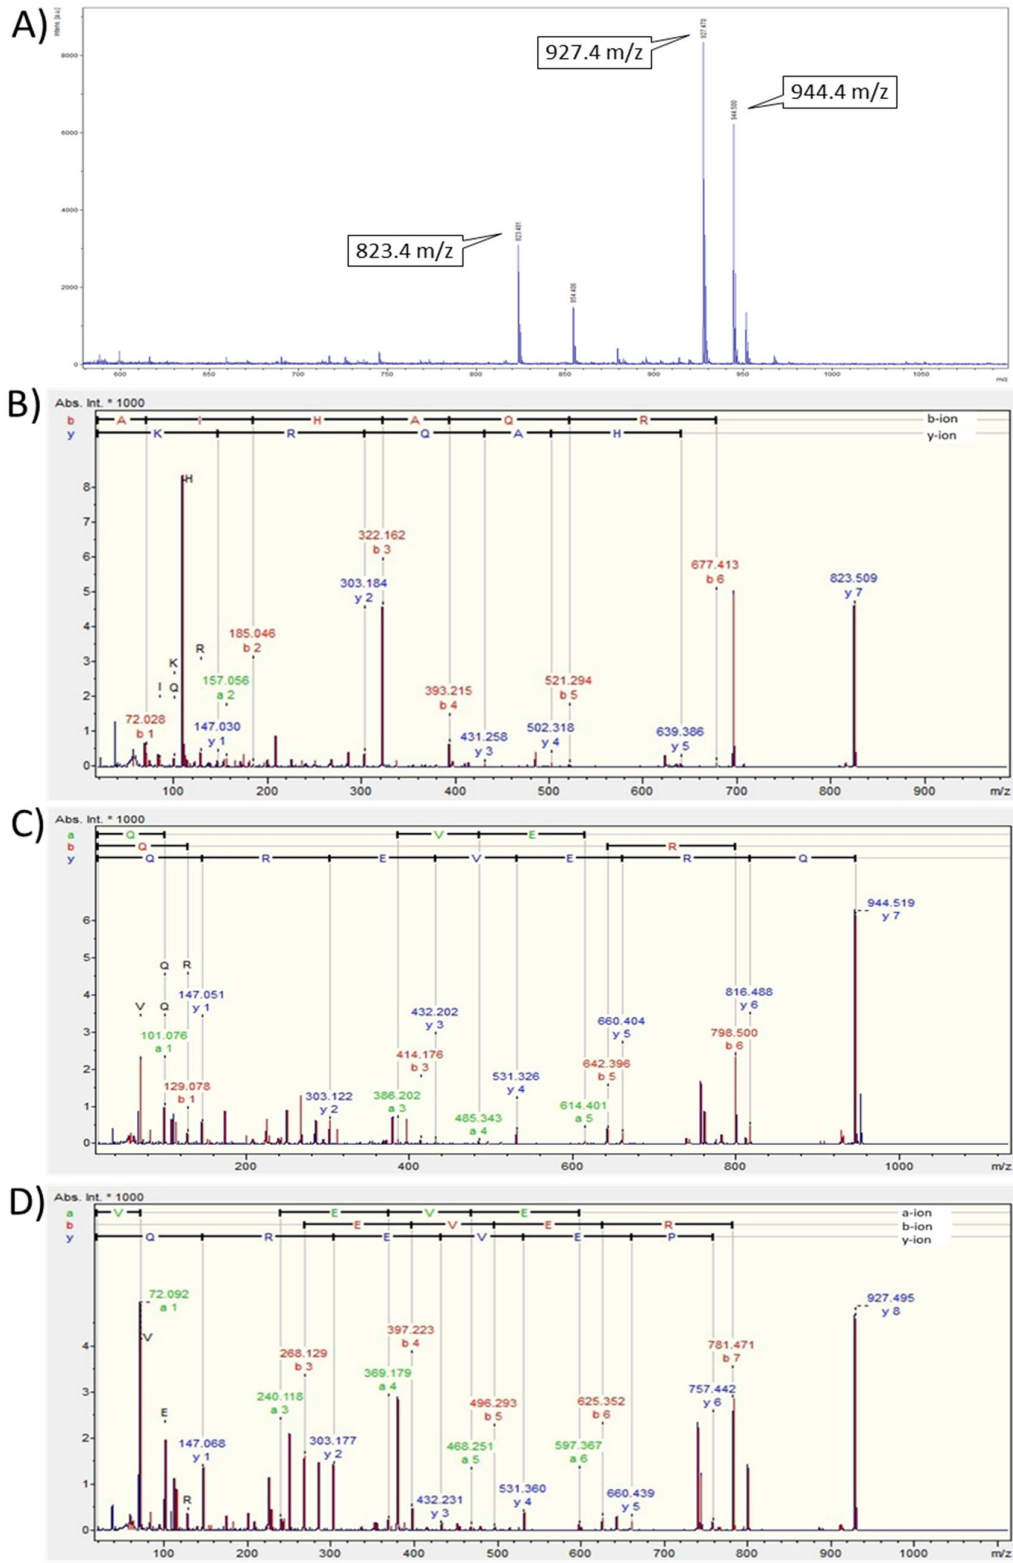

**Figure S11.** MS spectrum of H1-3 (A) and MS/MS identification of three peaks of  $m/z$  823.490 (B), 944.491 (C), and 927.470 (D).

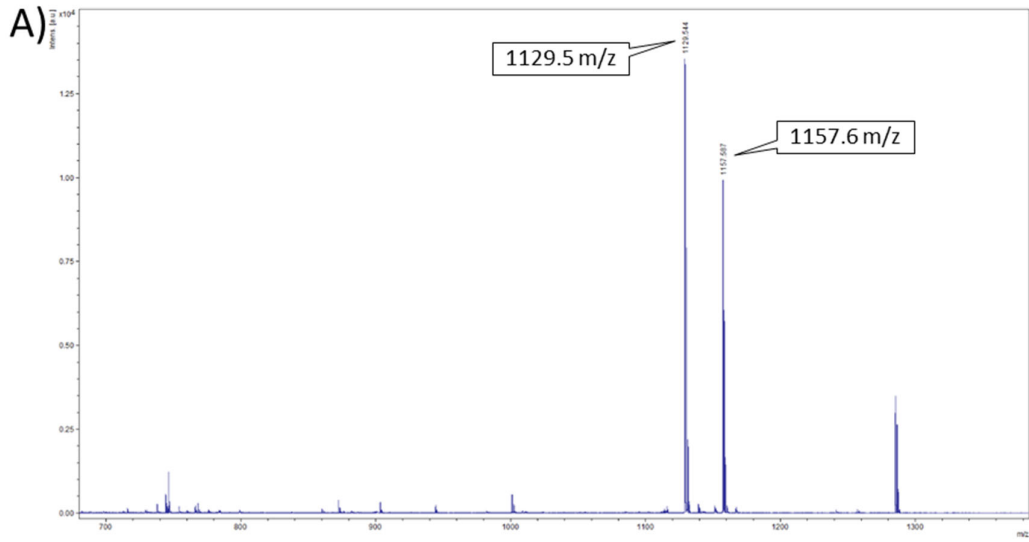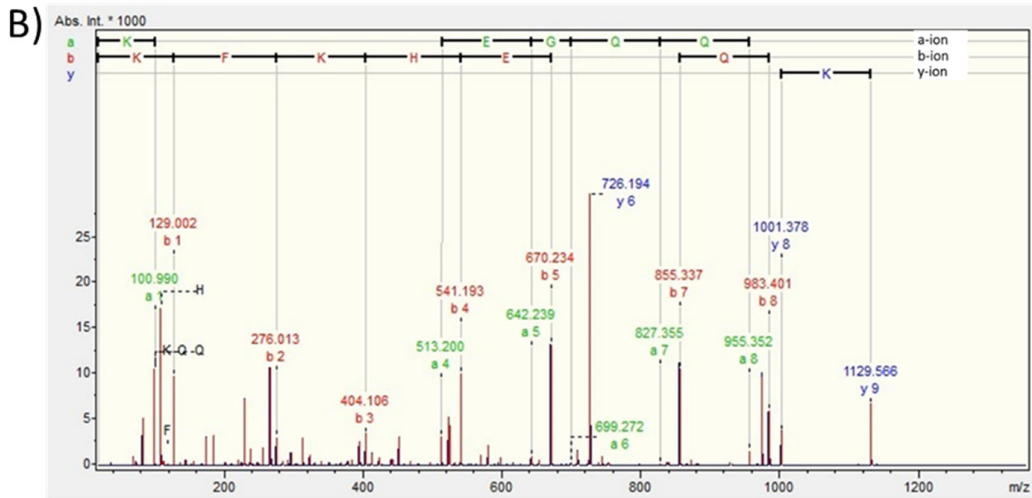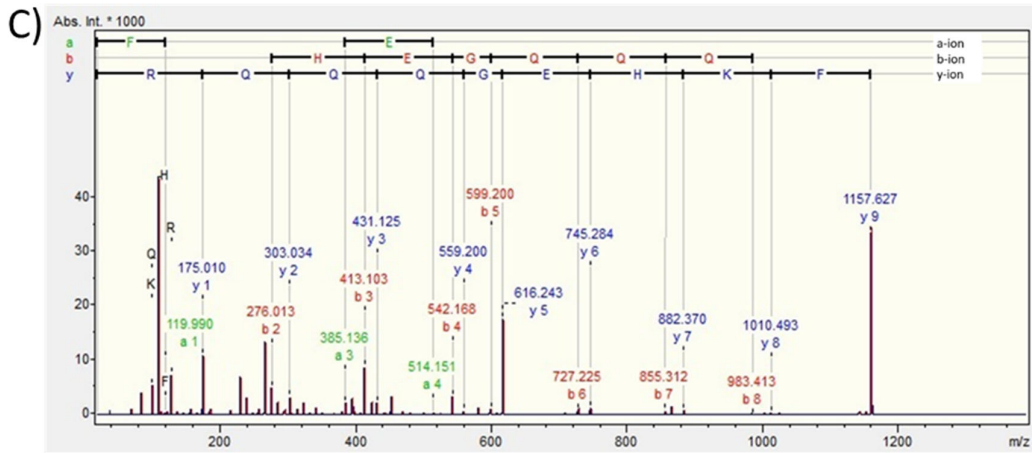

**Figure S12.** MS spectrum of H1-4 (A) and MS/MS identification of two peaks of  $m/z$  1129.575 (B) and 1157.581 (C).

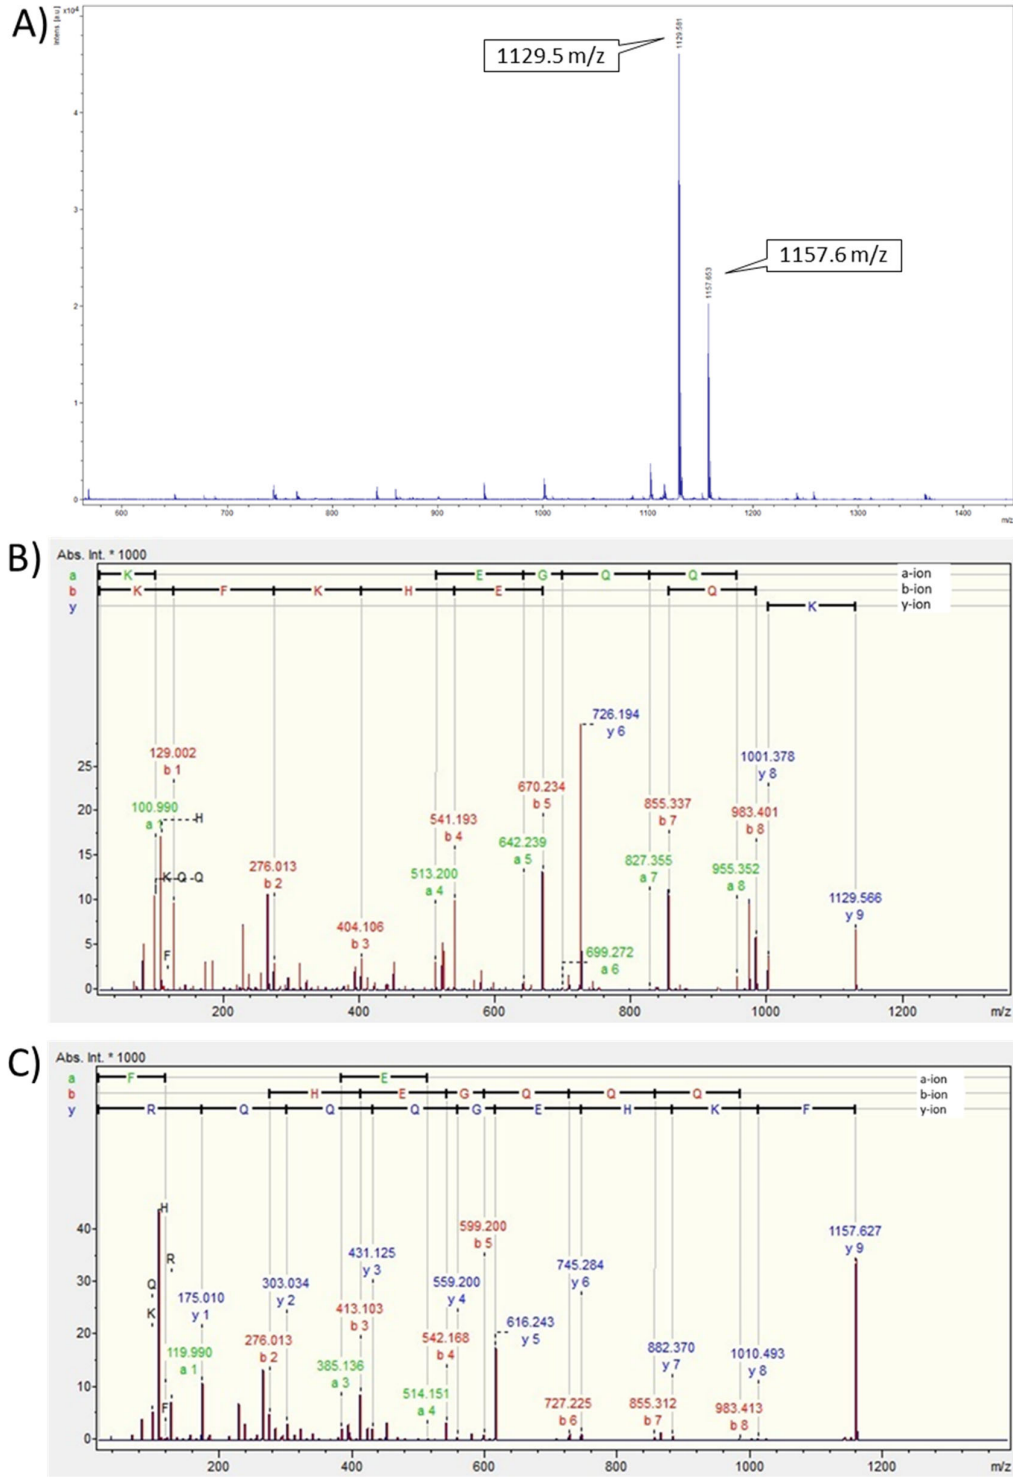

**Figure S13.** MS spectrum of H1-6 (A) and MS/MS identification of two peaks of  $m/z$  1129.575 (B) and 1157.581 (C).

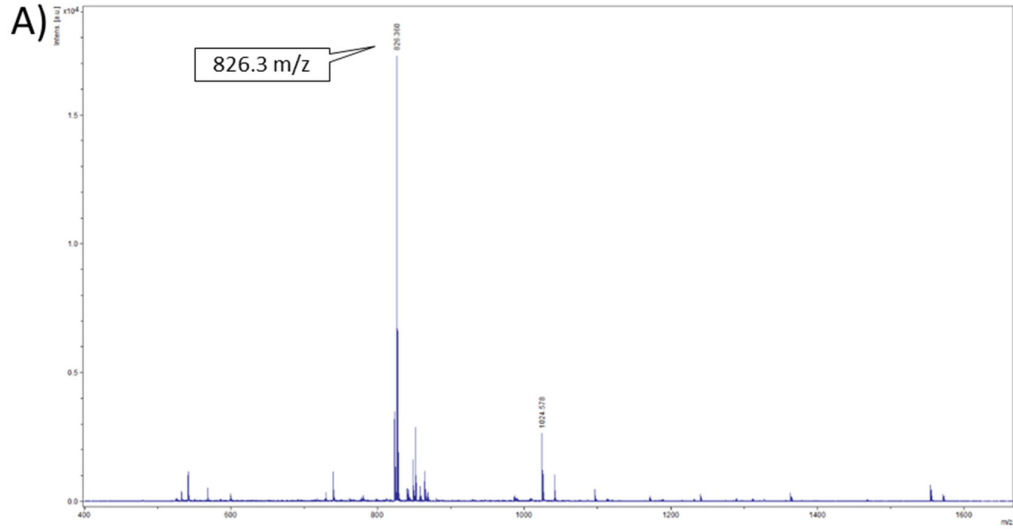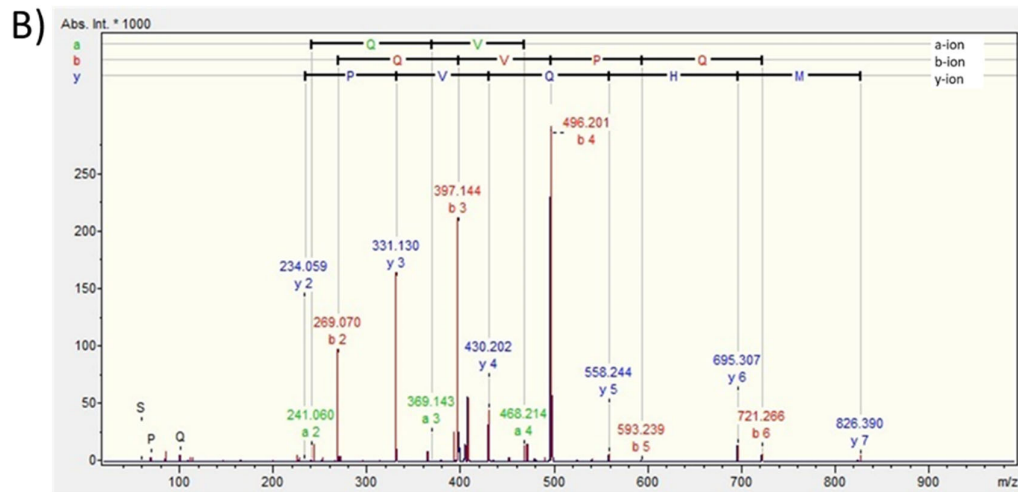

Figure S14. MS spectrum of H1-7 (A) and MS/MS identification of a peak of  $m/z$  826.388 (B).

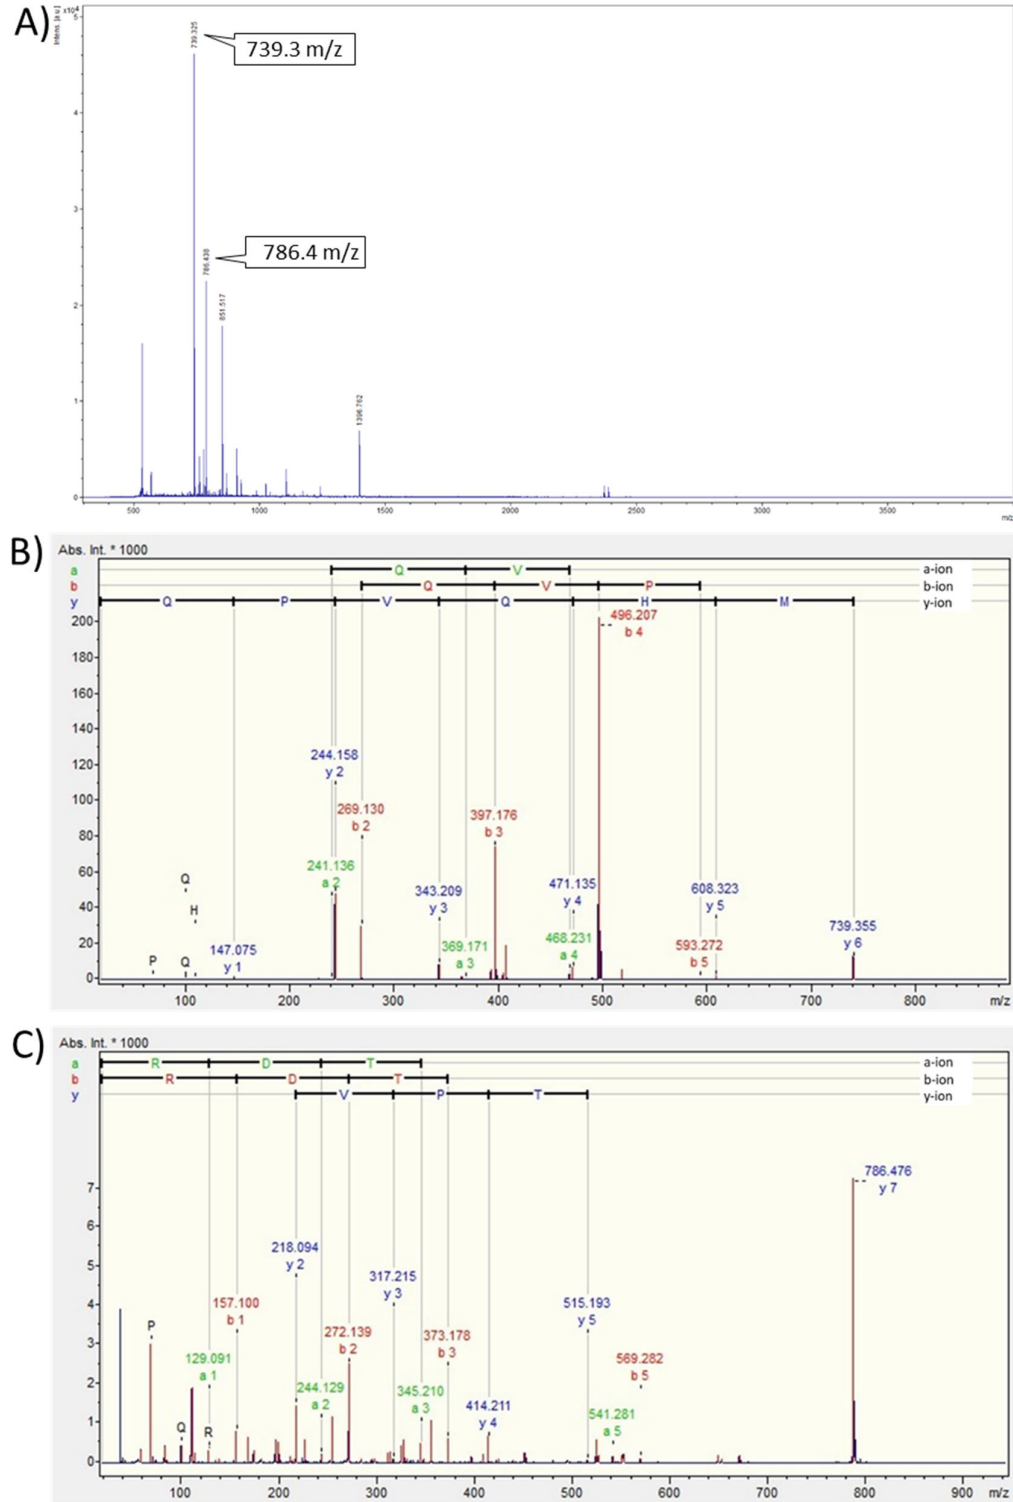

**Figure S15.** MS spectrum of H1-8 (A) and MS/MS identification of two peaks of  $m/z$  739.356 (B) and 786.410 (C).

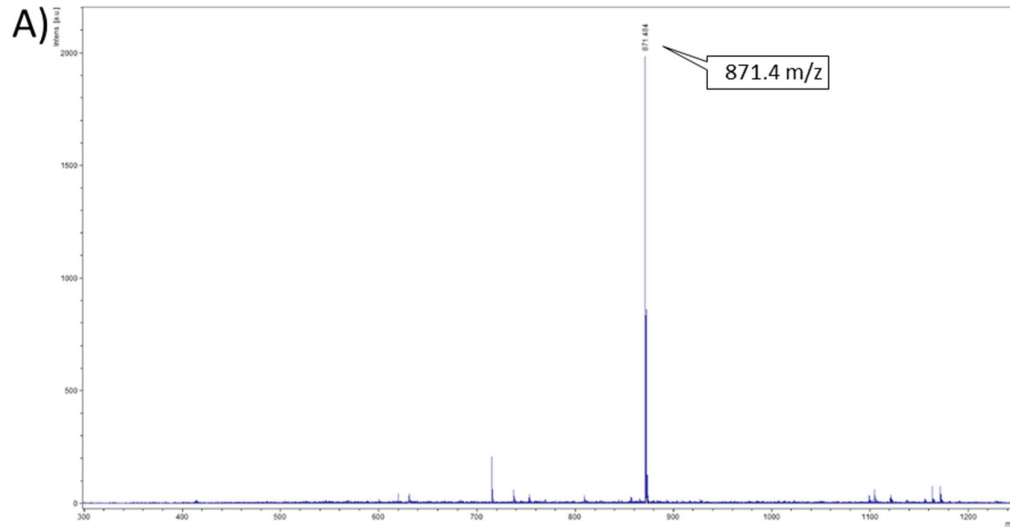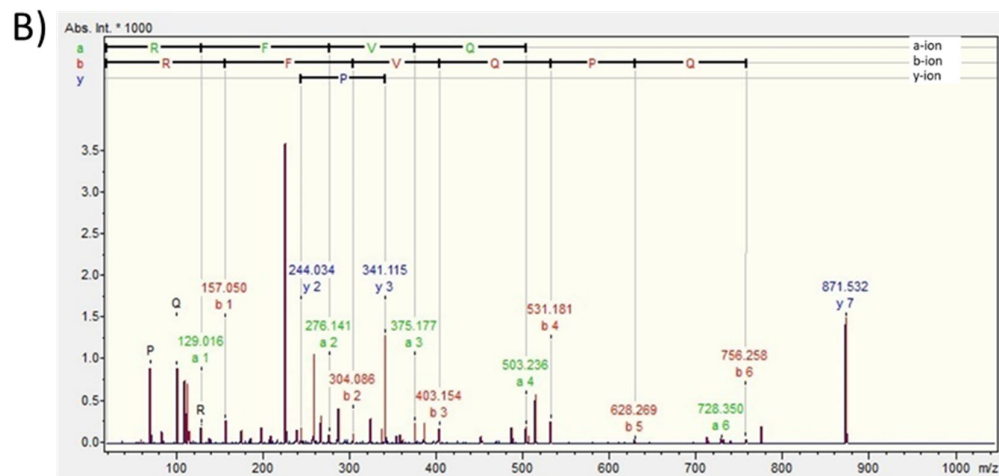

Figure S16. MS spectrum of H1-10 (A) and MS/MS identification of a peak of  $m/z$  871.484 (B).



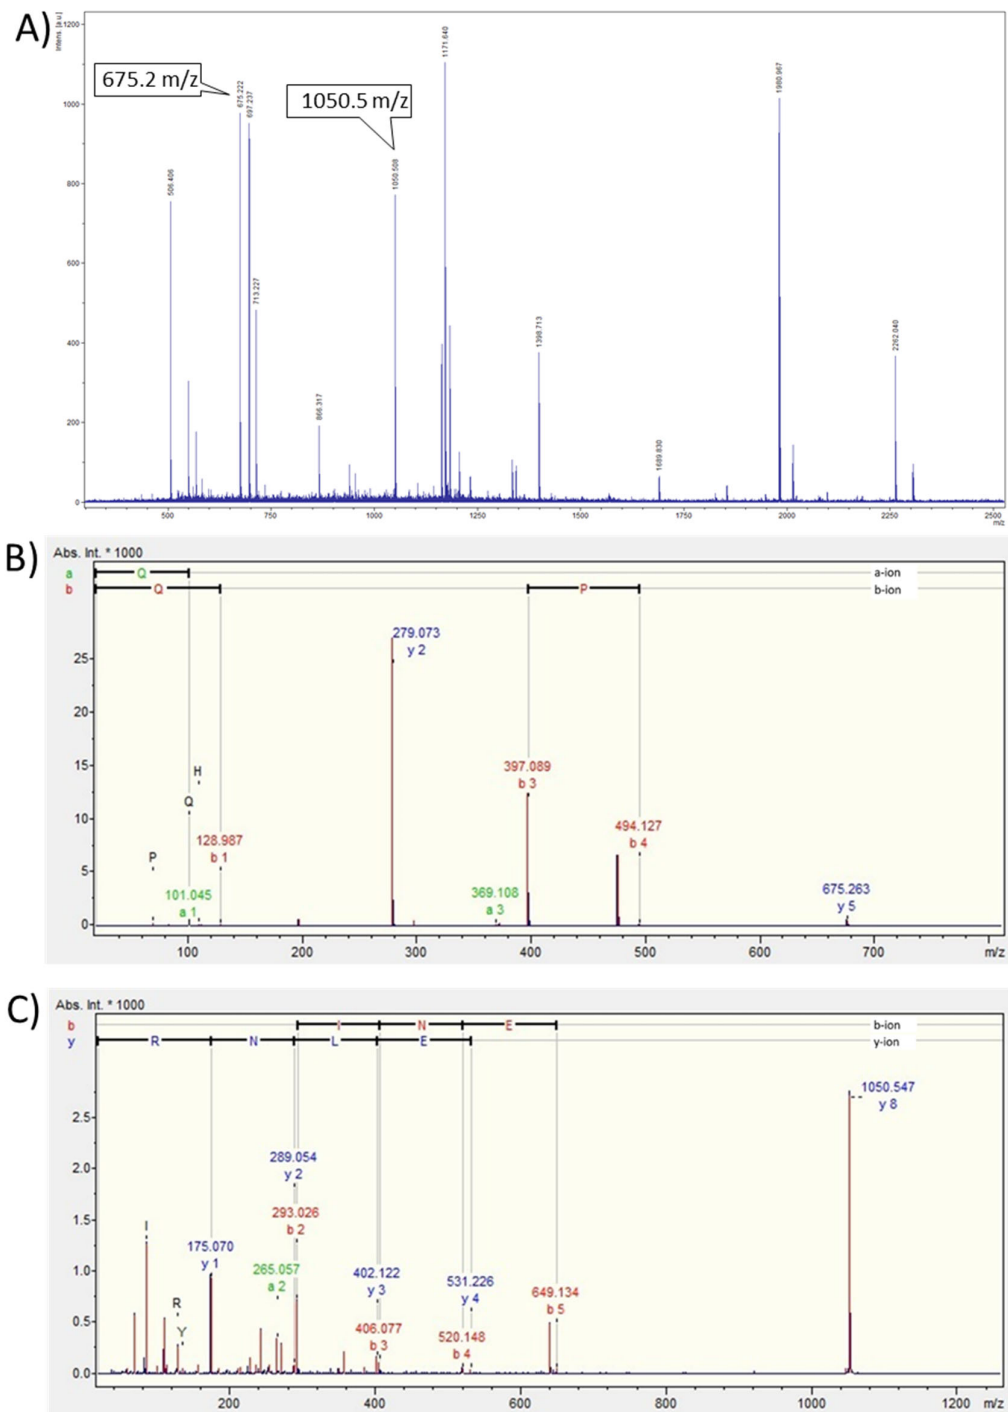

**Figure S17.** MS spectrum of H1-13 (A) and MS/MS identification of two peaks of  $m/z$  675.222 (B) and 1050.508 (C).

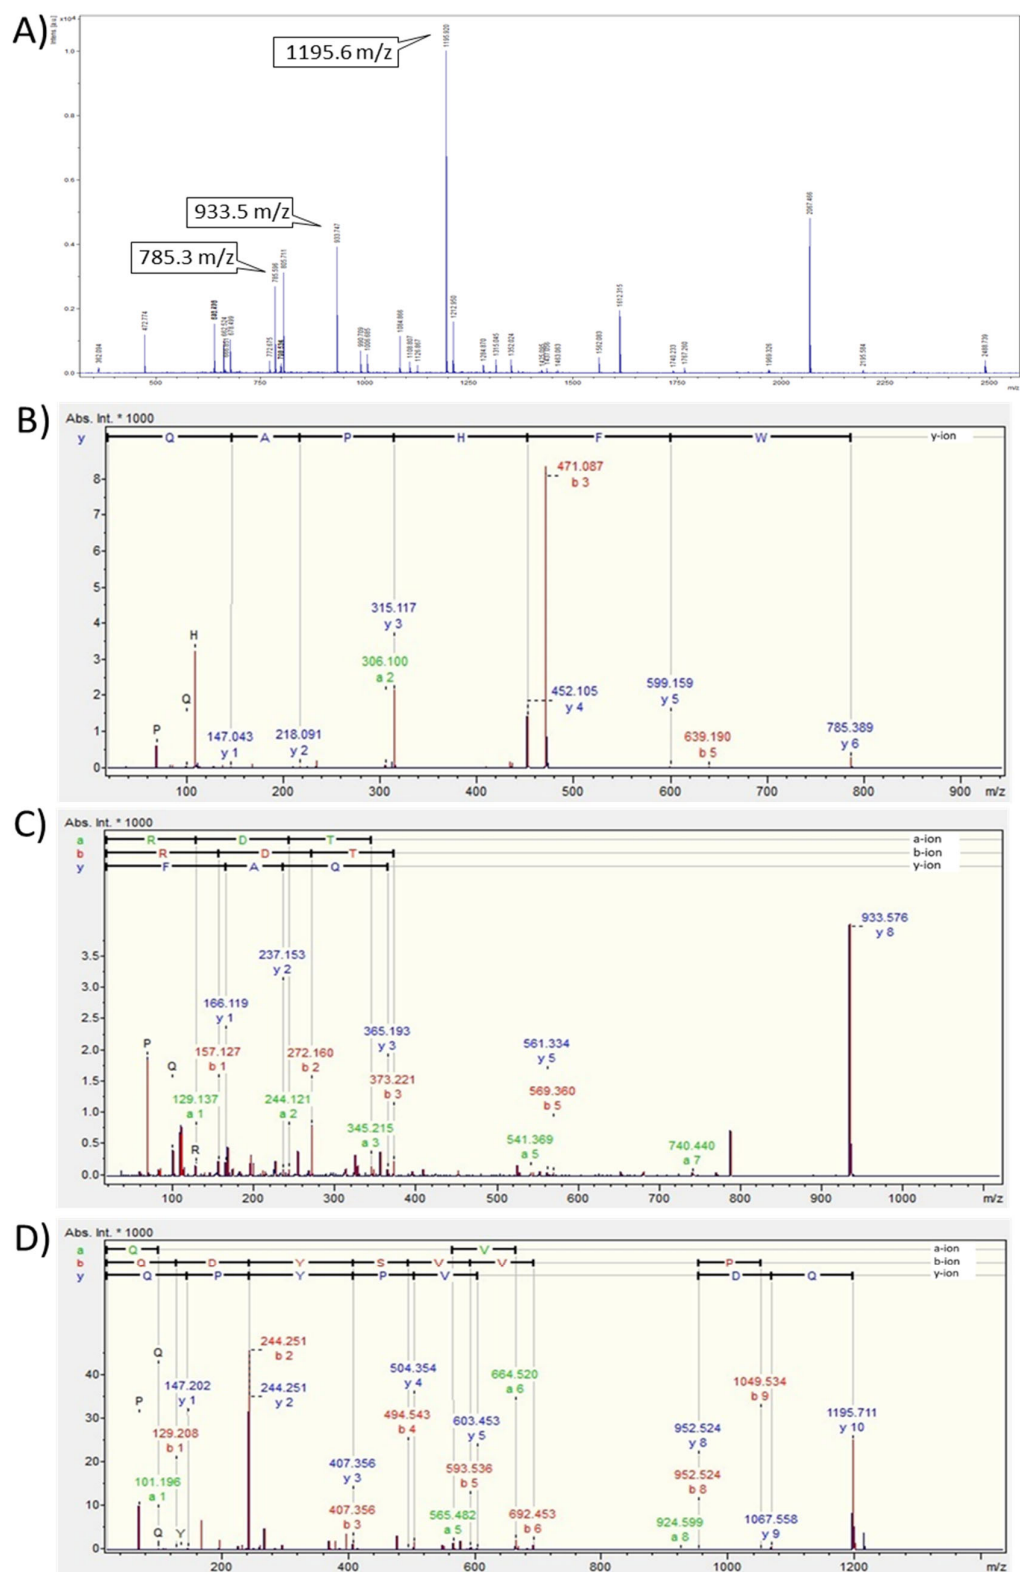

**Figure S18.** MS spectrum of H1-14 (A) and MS/MS identification of three peaks of  $m/z$  785.358 (B), 933.512 (C), and 1195.652 (D).

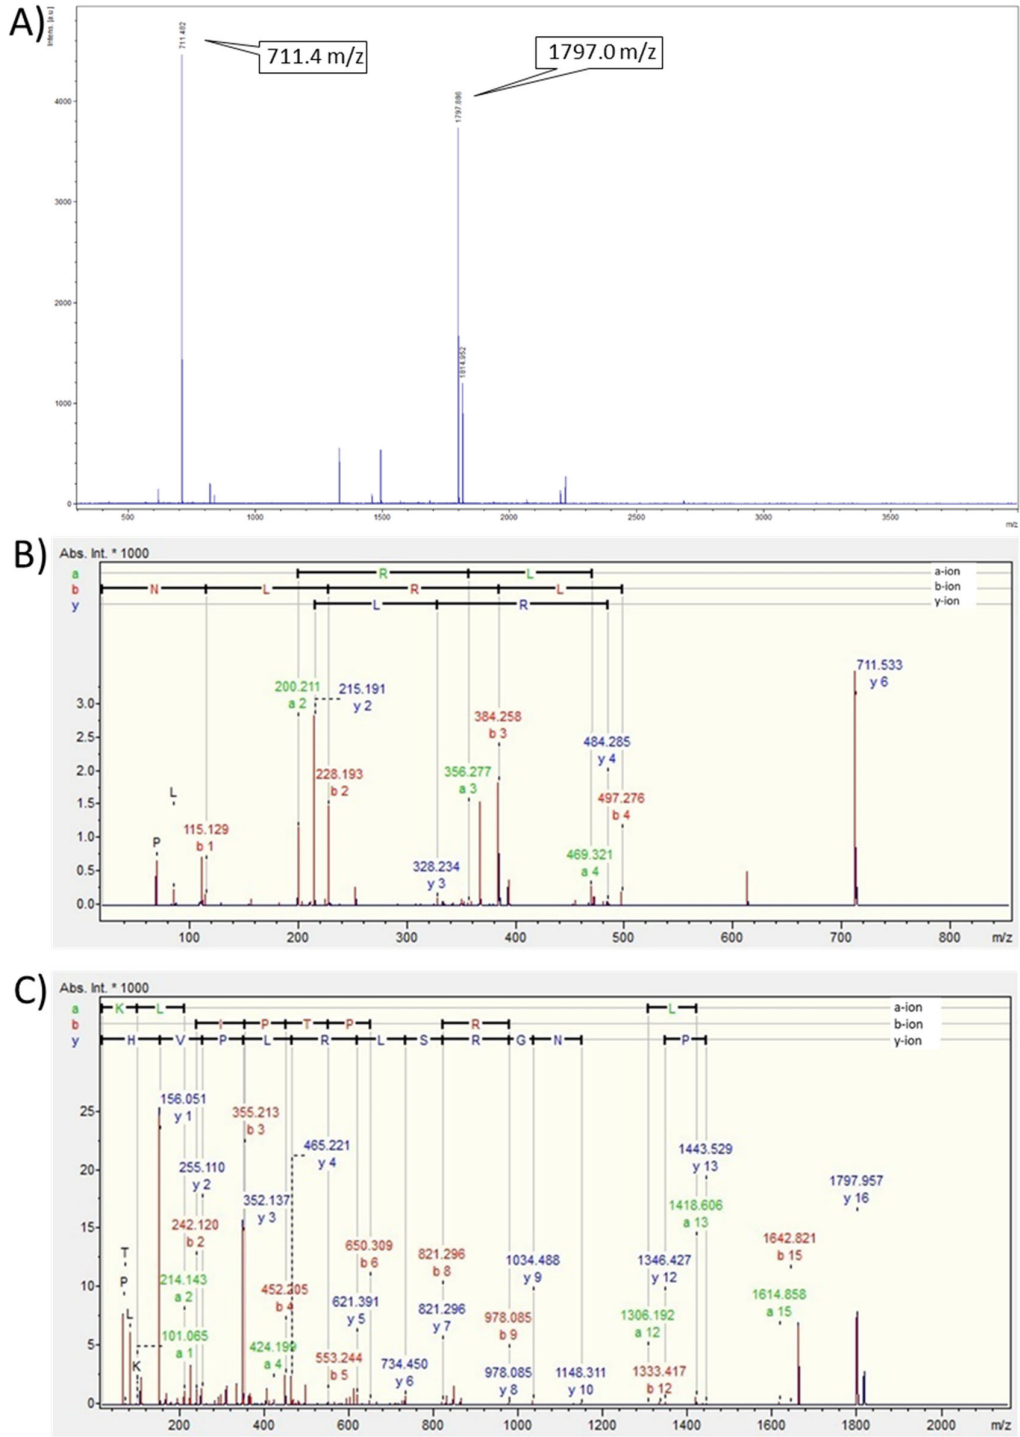

**Figure S19.** MS spectrum of H1-19 (A) and MS/MS identification of two peaks of  $m/z$  711.451 (B) and 1797.000 (C).

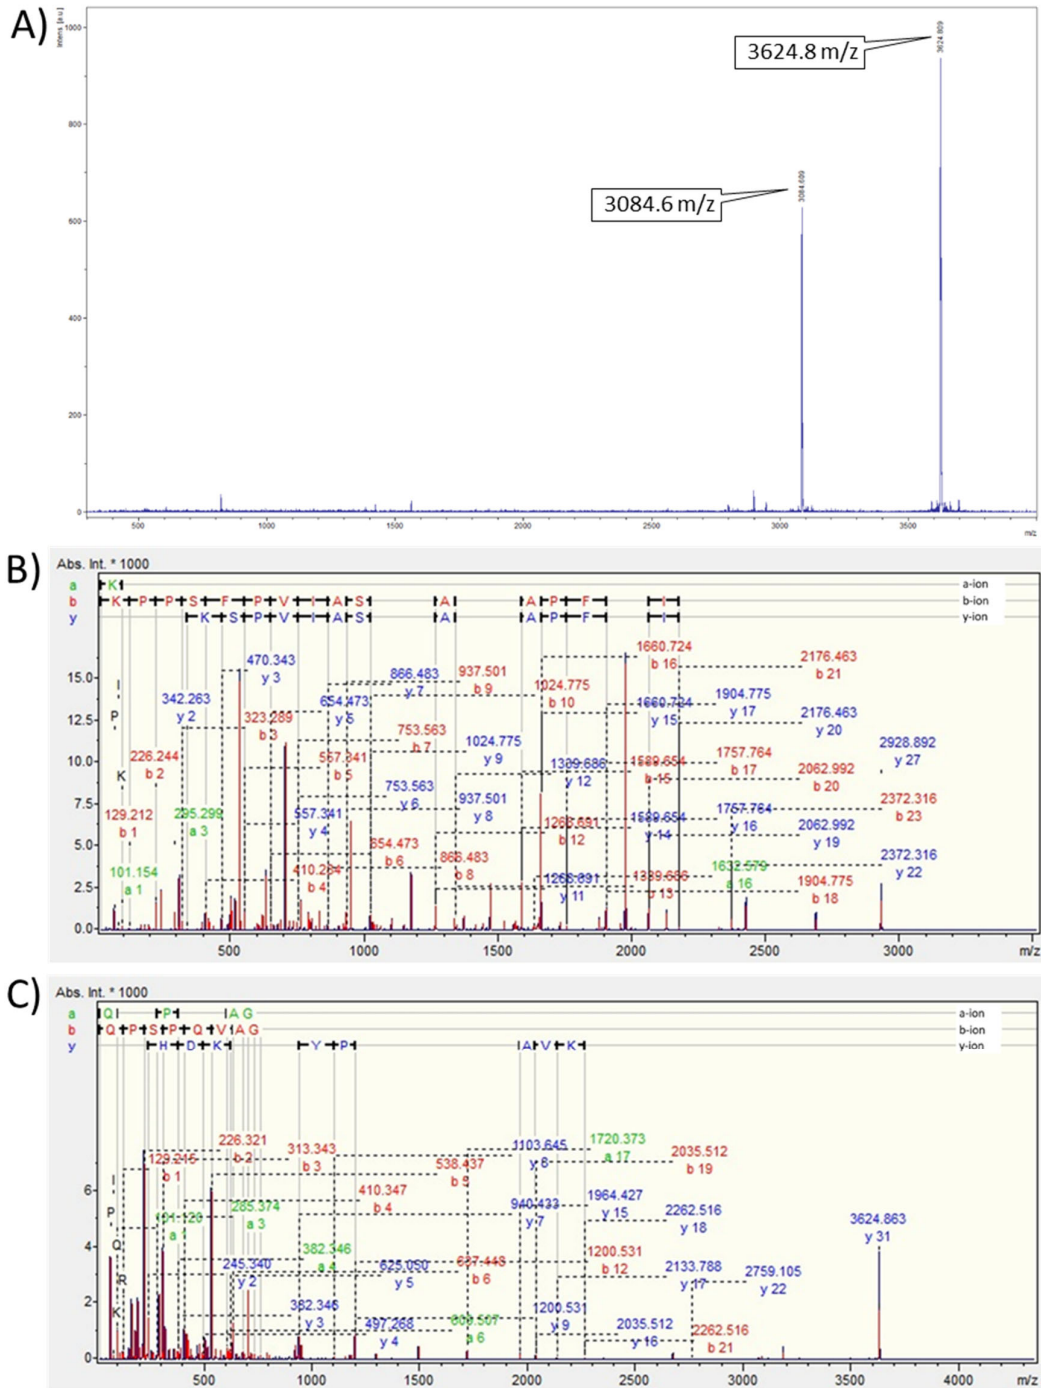

**Figure S20.** MS spectrum of H1-20 (A) and MS/MS identification of two peaks of  $m/z$  3084.609 (B) and 3624.809 (C).

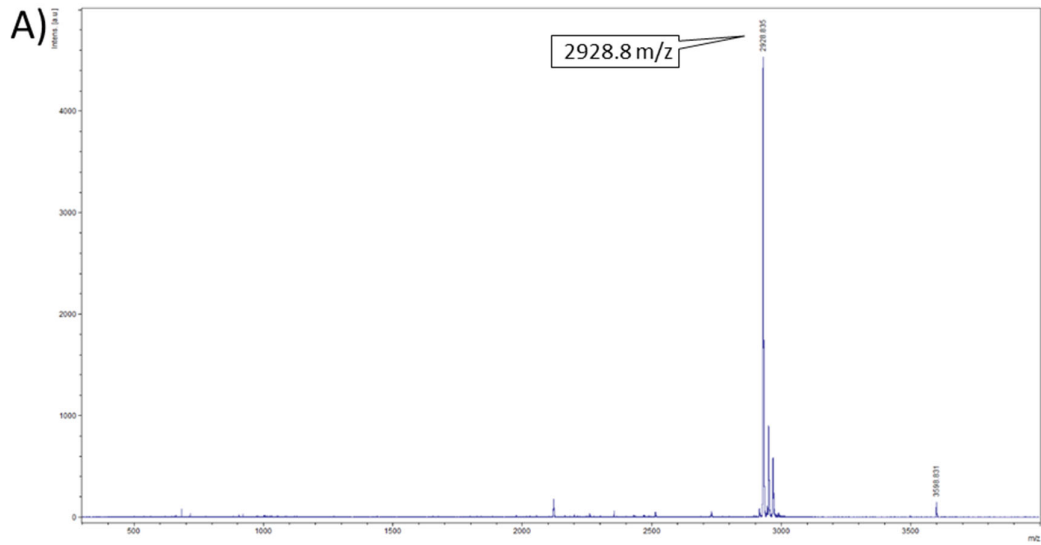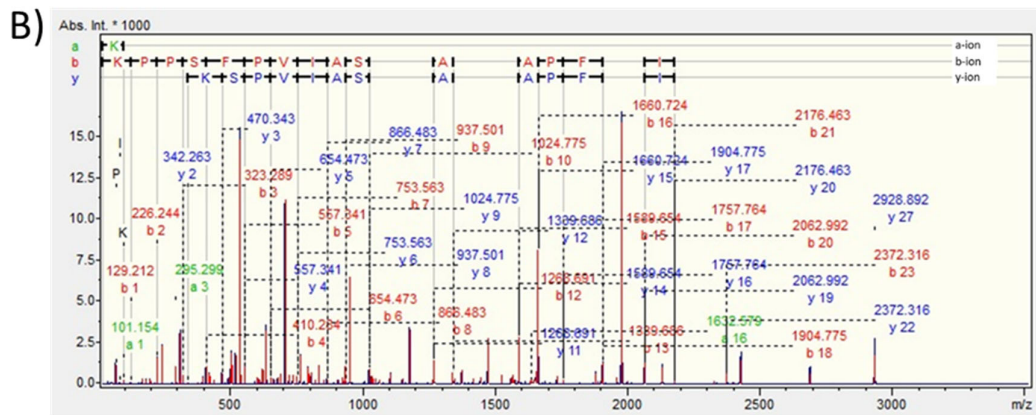

**Figure S21.** MS spectrum of H1-21 (A) and MS/MS identification of a peak of  $m/z$  2928.835 (B).

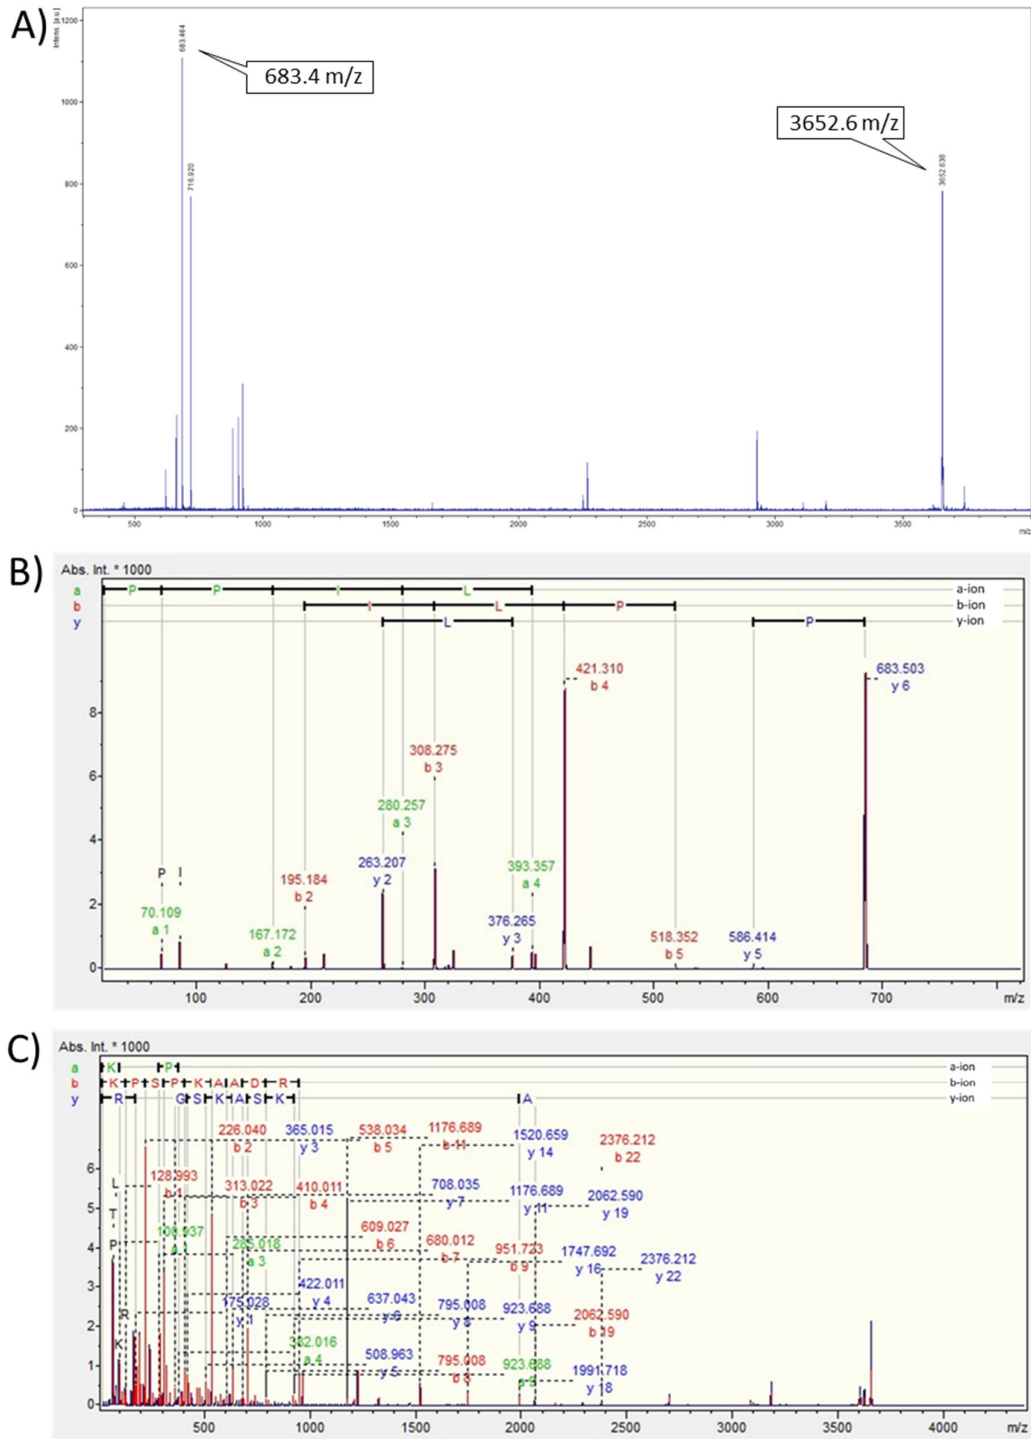

**Figure S22.** MS spectrum of H1-22 (A) and MS/MS identification of two peaks of  $m/z$  683.468 (B) and 3652.638 (C).
